# Supplementary material for: Evidence for interannual persistence of infectious influenza A viruses in Alaska wetlands
Source: PubMed Central journal article supplement (PMC9277558; doi:10.1016/j.scitotenv.2021.150078), 2021-09-03

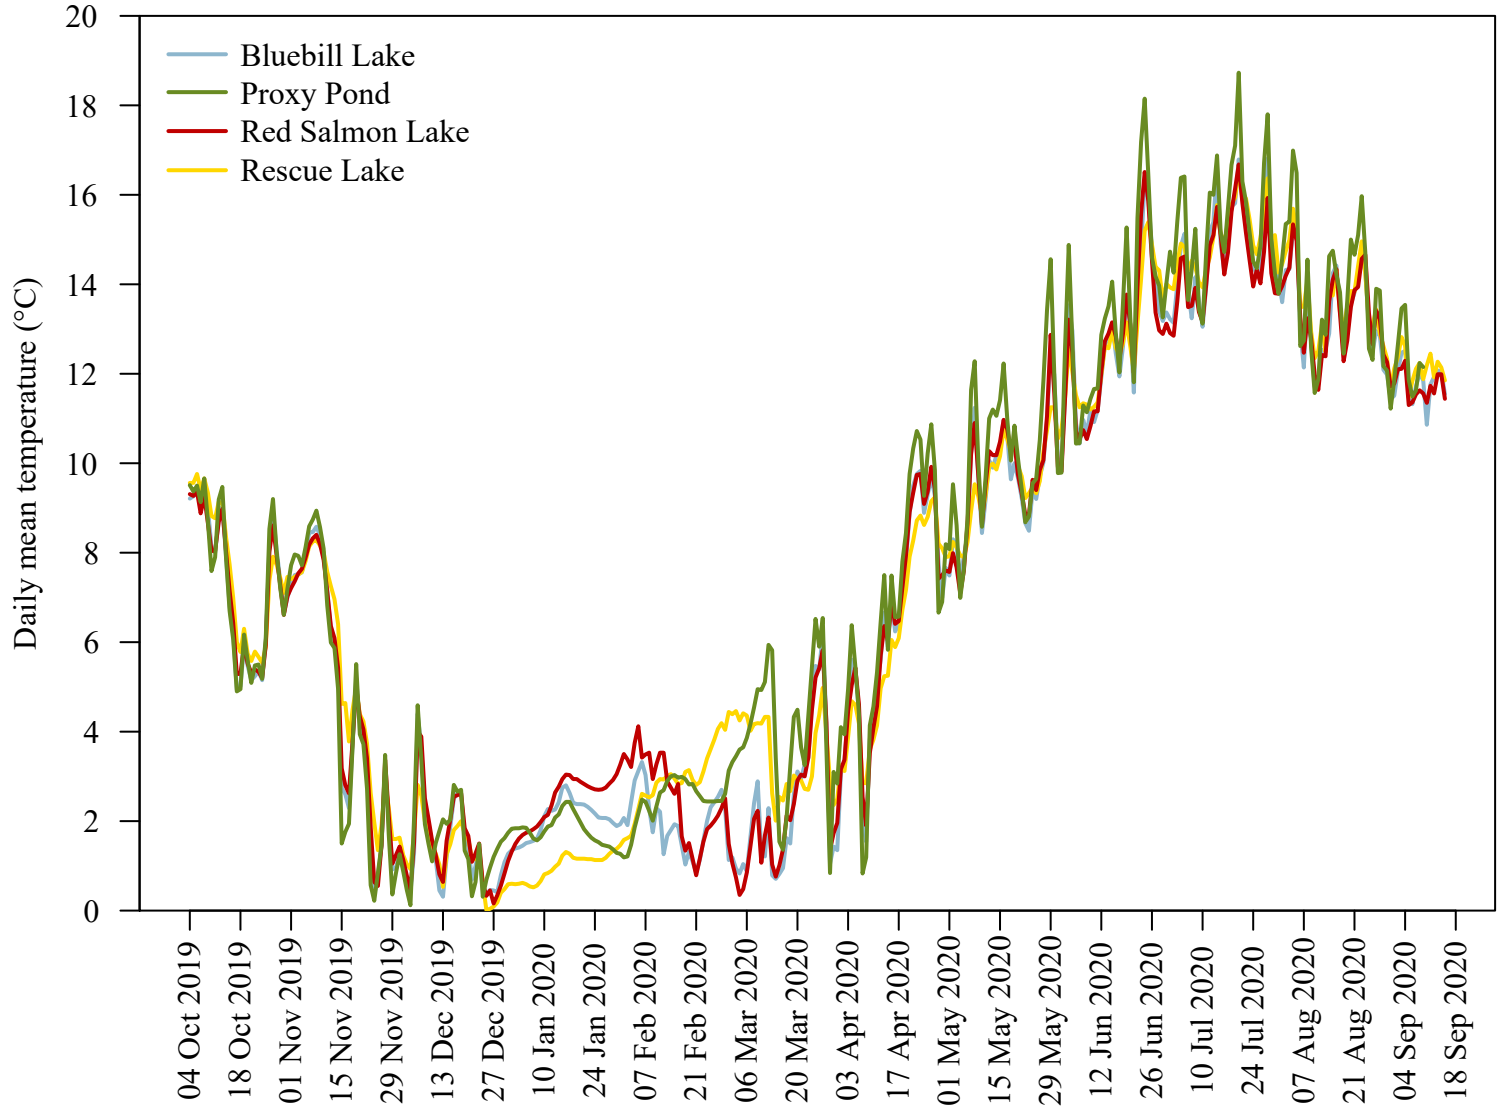

Supplement: NIHMS1818455-supplement-Supp_Figure_S1.pdf [file NIHMS1818455-supplement-Supp_Figure_S1.pdf]
